# Supplementary material for: Janus monolayer of WSeTe, a new structural phase transition material driven by electrostatic gating
Source: Royal Society of Chemistry journal article supplement (doi:10.1039/c8nr08151d), 2018-01-01
Supplement: c8nr08151d1.pdf [file c8nr08151d1.pdf]

Supporting Information for

**Janus Monolayer of WSeTe, A New Structural Phase Transition  
Material Driven by Electrostatic Gating**

Yajing Sun<sup>†</sup>, Zhigang Shuai<sup>†‡</sup>, and Dong Wang<sup>\*†</sup>

<sup>†</sup>MOE Key Laboratory of Organic Opto Electronics and Molecular Engineering,  
Department of Chemistry, Tsinghua University, Beijing 100084, P R China

<sup>‡</sup>Key Laboratory of Organic Solids, Beijing National Laboratory for Molecular  
Science (BNLMS), Institute of Chemistry, Chinese Academy of Sciences, Beijing  
100190, P R China

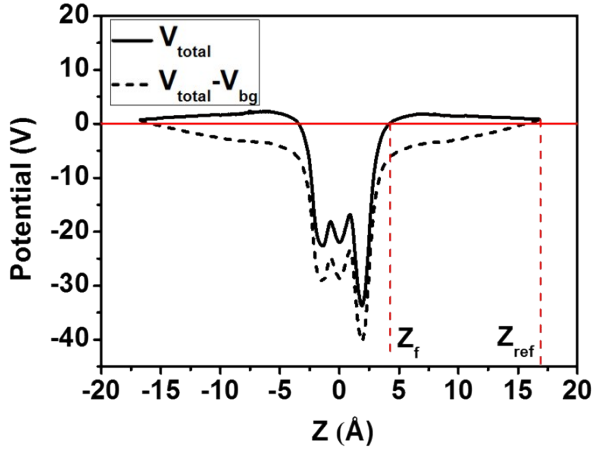

Figure S1 Plane-averaged electrostatic potential along the vacuum direction  $Z$  of a charged ( $0.05 e$  per formula unit) Janus monolayer of WSeTe in the H phase. The black solid line shows the total potential  $V_{\text{total}}$ , including the potential arising from the charged monolayer and that from the uniform compensating background charge  $V_{\text{bg}}$ . The dashed line shows the potential of the charged monolayer only,  $V_{\text{total}} - V_{\text{bg}}$ . The red line denotes the Fermi level  $\mu_F$  of a charged system.

In a DFT calculation of a charged system with periodic boundary conditions, a homogeneous background charge is automatically introduced to compensate for the excess charge. We choose the middle plane of the vacuum slab as the reference plane. The reference plane is parallel to the monolayer, at a distance  $z^{\text{ref}}$  away from the Janus monolayer center. The energy of the charged monolayer  $E_{\text{mo}}(Q, z^{\text{ref}})$  can be calculated by,<sup>1</sup>

$$E_{\text{mo}}(Q, z^{\text{ref}}) = E_0 + \int_0^Q \Delta V(Q', z^{\text{ref}}) dQ' \quad (1)$$

where  $E_0$  is the ground-state energy of an electrically neutral monolayer, the integral is the energy of moving charge  $Q'$  from the reference plane to the Fermi level of the monolayer, and  $\Delta V(Q', z^{\text{ref}})$  is the electronic potential difference between the reference plane  $z^{\text{ref}}$  and the surface of the monolayer defined as  $z_f$ . As illustrated in Figure S1,  $z_f$  is the distance at which the total potential is equal to the Fermi level.

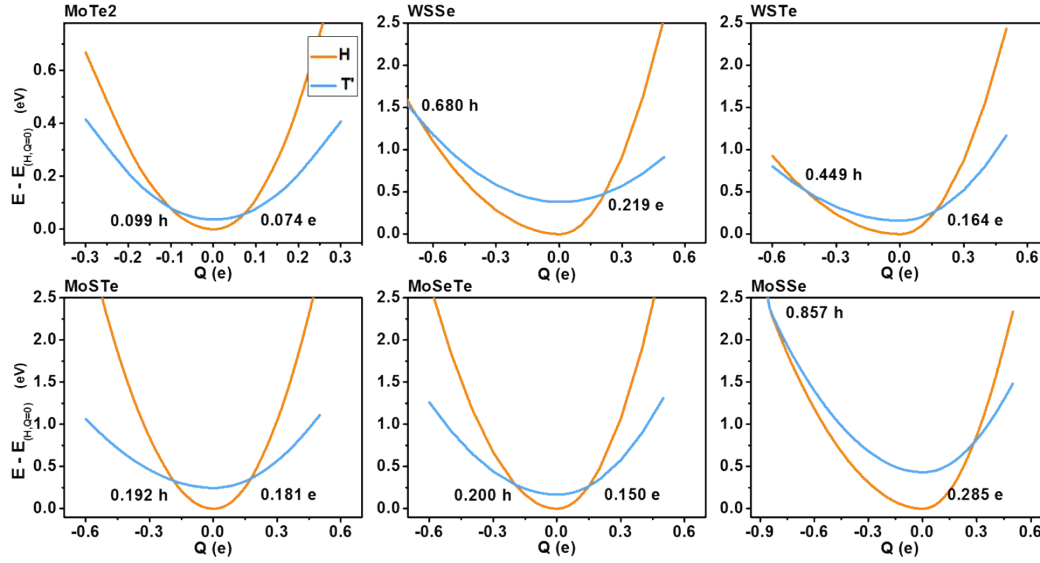

Figure S2 Energies of MoTe<sub>2</sub> and Janus monolayer MXY except for WSeTe in the H and T' phases respectively, as a function of the excessive charge.

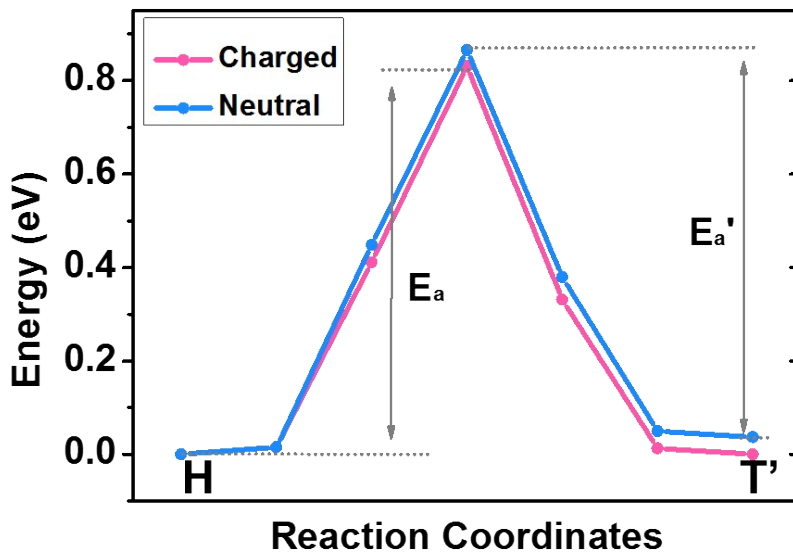

Figure S3 The NEB results of the phase transition barriers between T' and H phases of MoTe<sub>2</sub> monolayer.  $E_a = 0.833$  eV/f.u. is the kinetic barrier for the H-to-T' phase transition with MoTe<sub>2</sub> in the charged state (0.074 e/f.u. or 0.099 h/f.u. where H and T' phases are equally stable), and  $E_a' = 0.83$  eV is the reversed T'-to-H transition barrier with MoTe<sub>2</sub> in the charge neutral state. These two barriers are related to the kinetics of the structural phase transition modulated by electrostatic doping in the FET device.

**Table S1** Structural parameters and the total energy of MoTe<sub>2</sub> and six Janus monolayers of TMDCs in the H and T' phases, respectively. **a** and **b** are the lattice

parameters of the unit cell,  $h$  is the thickness of monolayers, referring to the height between the top-layer and bottom-layer chalcogen atoms,  $\Delta E$  is the energy difference between H and T' phases,  $E_{T'} - E_H$ .

|        |    | a /Å  | b /Å  | Height (h) /Å | E /eV   | $\Delta E$ / meV |
|--------|----|-------|-------|---------------|---------|------------------|
| MoTe2  | H  | 3.522 | \     | 3.620         | -18.635 | 36               |
|        | T' | 3.451 | 6.297 | 4.135         | -18.598 |                  |
| MoSSe  | H  | 3.232 | \     | 3.239         | -21.181 | 432              |
|        | T' | 3.199 | 5.837 | 3.609         | -20.749 |                  |
| MoSTe  | H  | 3.339 | \     | 3.385         | -20.138 | 247              |
|        | T' | 3.308 | 6.036 | 3.787         | -19.891 |                  |
| MoSeTe | H  | 3.406 | \     | 3.620         | -19.426 | 167              |
|        | T' | 3.359 | 6.129 | 3.939         | -19.259 |                  |
| WSSe   | H  | 3.231 |       | 3.252         | -23.135 | 586              |
|        | T' | 3.233 | 5.801 | 3.633         | -22.548 |                  |
| WSTe   | H  | 3.340 |       | 3.396         | -21.951 | 159              |
|        | T' | 3.342 | 5.997 | 3.824         | -21.792 |                  |
| WSeTe  | H  | 3.405 |       | 3.502         | -21.182 | 48               |
|        | T' | 3.390 | 6.083 | 3.982         | -21.134 |                  |

#### Reference

(1) Li, Y.; Duerloo, K. A.; Wauson, K.; Reed, E. J. Structural Semiconductor-to-Semimetal Phase Transition in Two-Dimensional Materials Induced by Electrostatic Gating. *Nat Commun* **2016**, *7*, 10671.
